# Supplementary material for: Identification of Pathologic and Prognostic Genes in Prostate Cancer Based on Database Mining
Source: Front Genet. 2022 Mar 11;13:854531. doi: 10.3389/fgene.2022.854531 (PMC8963346; doi:10.3389/fgene.2022.854531)
Supplement: Supplementary file 2 [file Table3.XLSX]

## Sheet: Supplementary Table 3
Supplementary table 3 | Genes in module blue
SERPINB11
SERPINB3
FGFBP1
ITGB6
KCNJ5
CLCA4
SLPI
SLC14A1
SP6
TMPRSS4
C16orf74
MACC1
NTF4
PITX1
EFNB1
SCGB3A1
TP63
DSC3
TNS4
SIK1B
TGM1
B3GNT3
ZNF750
APOBEC3C
C2orf72
KRT4
MPZL2
MSMB
ARHGEF28
IL1RN
CRABP2
CLCA2
UPK1A
KRT13
CYP2W1
SOWAHA
ITPRIPL1
AVPI1
AQP3
CCDC110
GPX2
SOX15
PRDM8
KRT14
KCNQ1
TUBB2A
POF1B
FOXQ1
GSTP1
MSLN
LOC101927870
KRT7.AS
FAM83B
SLC34A2
FAM110C
NXPE4
CD177
DMKN
NEURL3
ACSF2
LOC100507336
SERPINB5
NYNRIN
KRT23
DUSP2
BNIPL
TMEM238L
PTGES
FCGBP
KRT16
OTX1
ZNF711
FOXI1
CALML3
SCNN1A
GCNT1
LAMB3
SLCO3A1
RASSF5
MUC15
TMPRSS11E
S1PR5
LOC105371267
CXCL17
PALM3
CEACAM6
ZBTB7C
GGT6
KRT6A
CHP2
DEFB1
EPHA2
S100A14
RHCG
LYPD6B
LGALS4
SCGB2A1
TUBA4A
SNX31
CYP4F22
NCCRP1
FAM167A
VTCN1
FLRT3
CPA6
KLF5
APOBEC3D
ABO
SDC1
WFDC2
PPM1E
HAS3
PLA2G4D
ABCC3
LOC105370969
LINC02541
CYP24A1
GLYATL1B
NRG2
KRT15
LRP4
ARHGAP40
LRMP
CAPNS2
DUOX2
RAPGEFL1
SLC16A5
RAB38
GALNT5
LURAP1
SCGB1A1
DLK2
RNF128
EBF2
ITGB4
PROM1
HCAR2
ALDH1A3
ETNK2
DKK1
LINC00092
CYP4B1
DUSP4
FOLR1
WNT3A
FUT2
ST6GALNAC2
KRT5
LY6D
SERPINB1
SLC39A2
RAB7B
HOXD11
ACE
ERN2
GPR87
DUOX1
NSG1
AOC1
ASS1
APOBEC3G
MECOM
WNT10A
CYP3A5
CXCL6
LINC00261
LOC100506098
HOXB3
NEFH
S100A9
CHST9
TMEM40
SLC2A9
HSPA4L
GJB3
OLFM4
KRT7
MIR23A
IL1RL2
LINC01503
C4orf19
B3GNT8
PLLP
SOX7
VAV3
HSD17B13
HR
TGM4
ID1
CPAMD8
VSNL1
TRIM29
PRRG4
SLC7A5
LINC01679
REPS2
GATA3
HOXD13
IER3
FOSL1
COL17A1
LINC01133
S100A2
GJB5
P2RY2
GABRP
VGLL1
BCL11A
MUC4
ADGRG6
MIR205HG
PAQR7
ADORA2B
PCP4L1
INAVA
FGFR2
FAT2
DUOXA1
